# Supplementary material
Source: Springer Nature journal article supplement (https://www.springermedizin.de/resource/supplementary/12883_2012_590_MOESM2_ESM.pdf/9455772)
Supplement: MOESM2 [file 9455772]

**2649**

Studies Retrieved from Medline,  
Embase and CENTRAL using a  
predefined search criterion

**160**

Duplicates  
Removed

**2489**

Unique Citations

**2456**

Studies Removed by  
Title and Abstract

**33**

Studies Retained for detailed  
Review

**25**

Studies Removed by  
Inclusion/ Exclusion  
criterion

**8**

Potentially Suitable  
Studies
